# Supplementary material
Source: PubMed Central journal article supplement (PMC6402968)
Supplement: NIHMS1005733-supplement-Supp_info.pdf [file NIHMS1005733-supplement-Supp_info.pdf]

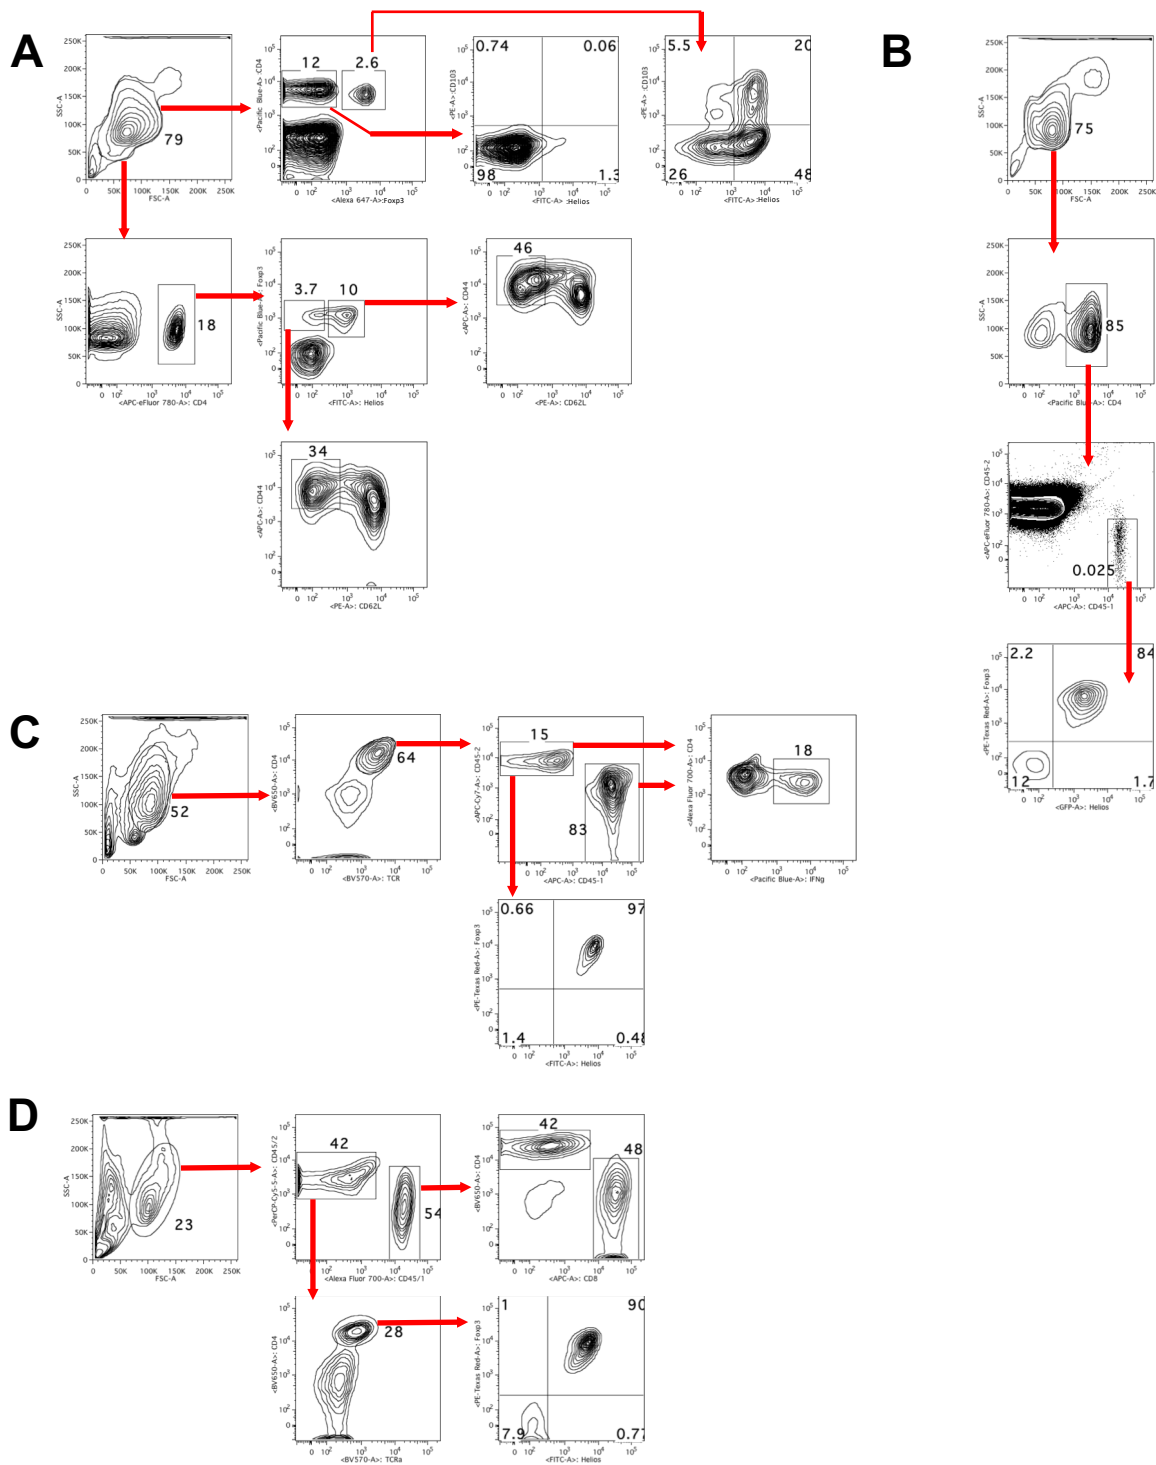

**Fig. S1. Gating strategy for flow cytometry experiments. (A)** Gating strategy for Fig. 1A, (quadrant gates for PE proteins-far right-were set on CD4+Foxp3- cells-2<sup>nd</sup> from right) Fig. 1B, Fig. 2A, Fig. 2B and Fig. 6D. **(B)** Gating strategy for Fig. 3. **(C)** Gating strategy for Fig. 4. **(D)** Gating strategy for Fig. 5.

### Targeted Allele

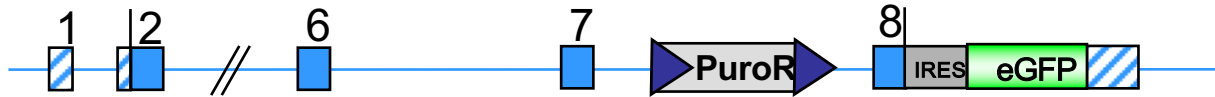

### Constitutive KI Allele

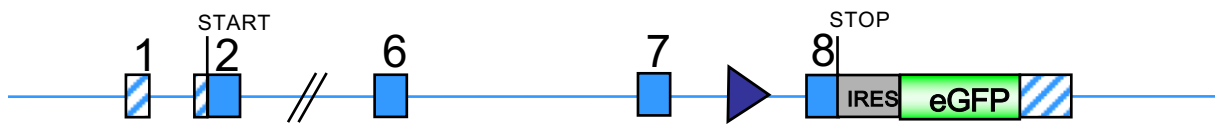

■ Ikzf2 exons

▨ Ikzf2 UTRs

▶ F3 site

**Fig. S2. Generation of the Helios-GFP reporter allele.** The targeted allele after homologous recombination (top) and after Flp recombination (bottom).

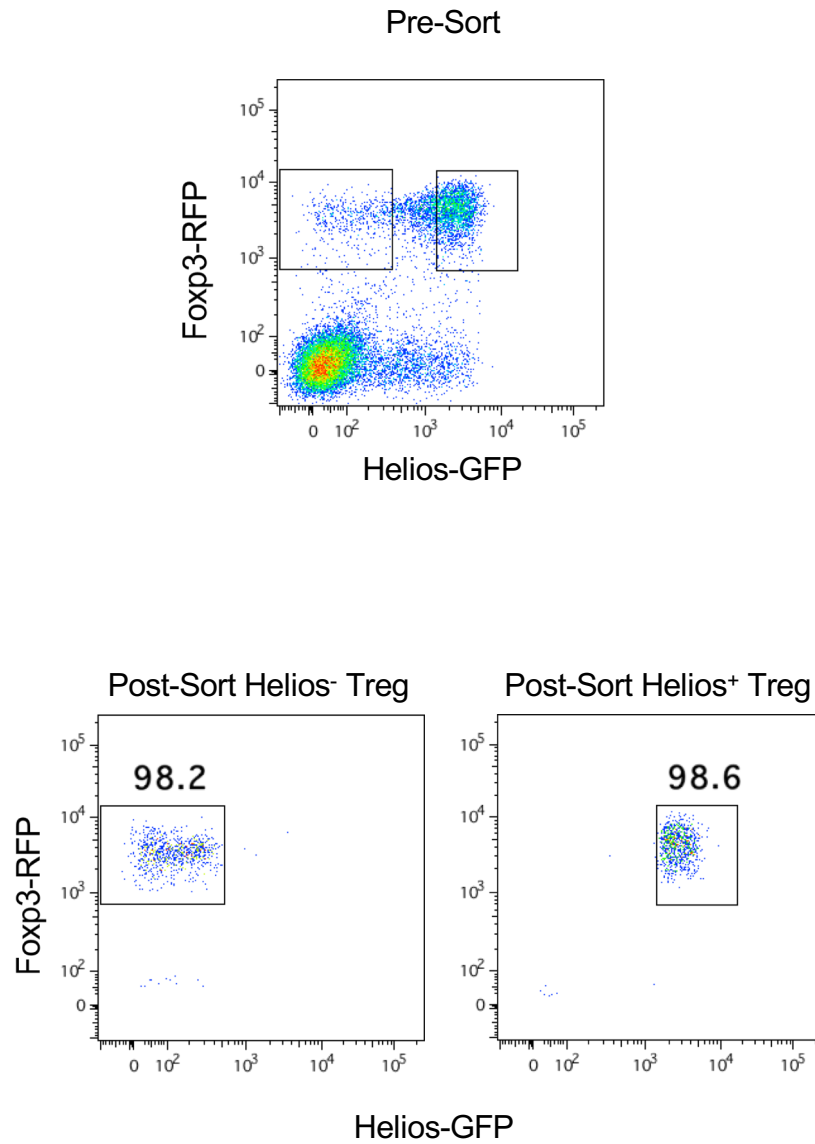

**Fig. S3. Sorting strategy for CD4<sup>+</sup>Foxp3<sup>+</sup>Helios<sup>-</sup> and CD4<sup>+</sup>Foxp3<sup>+</sup>Helios<sup>+</sup> cells.** Lymphocytes were stained with Pacific Blue anti-CD4 and cell sorted by gating on CD4<sup>+</sup> cells. The typical gates for CD4<sup>+</sup>Foxp3<sup>+</sup>Helios<sup>-</sup> are indicated on the left and CD4<sup>+</sup>Foxp3<sup>+</sup>Helios<sup>+</sup> cells on the right. Post sort analysis is shown below.



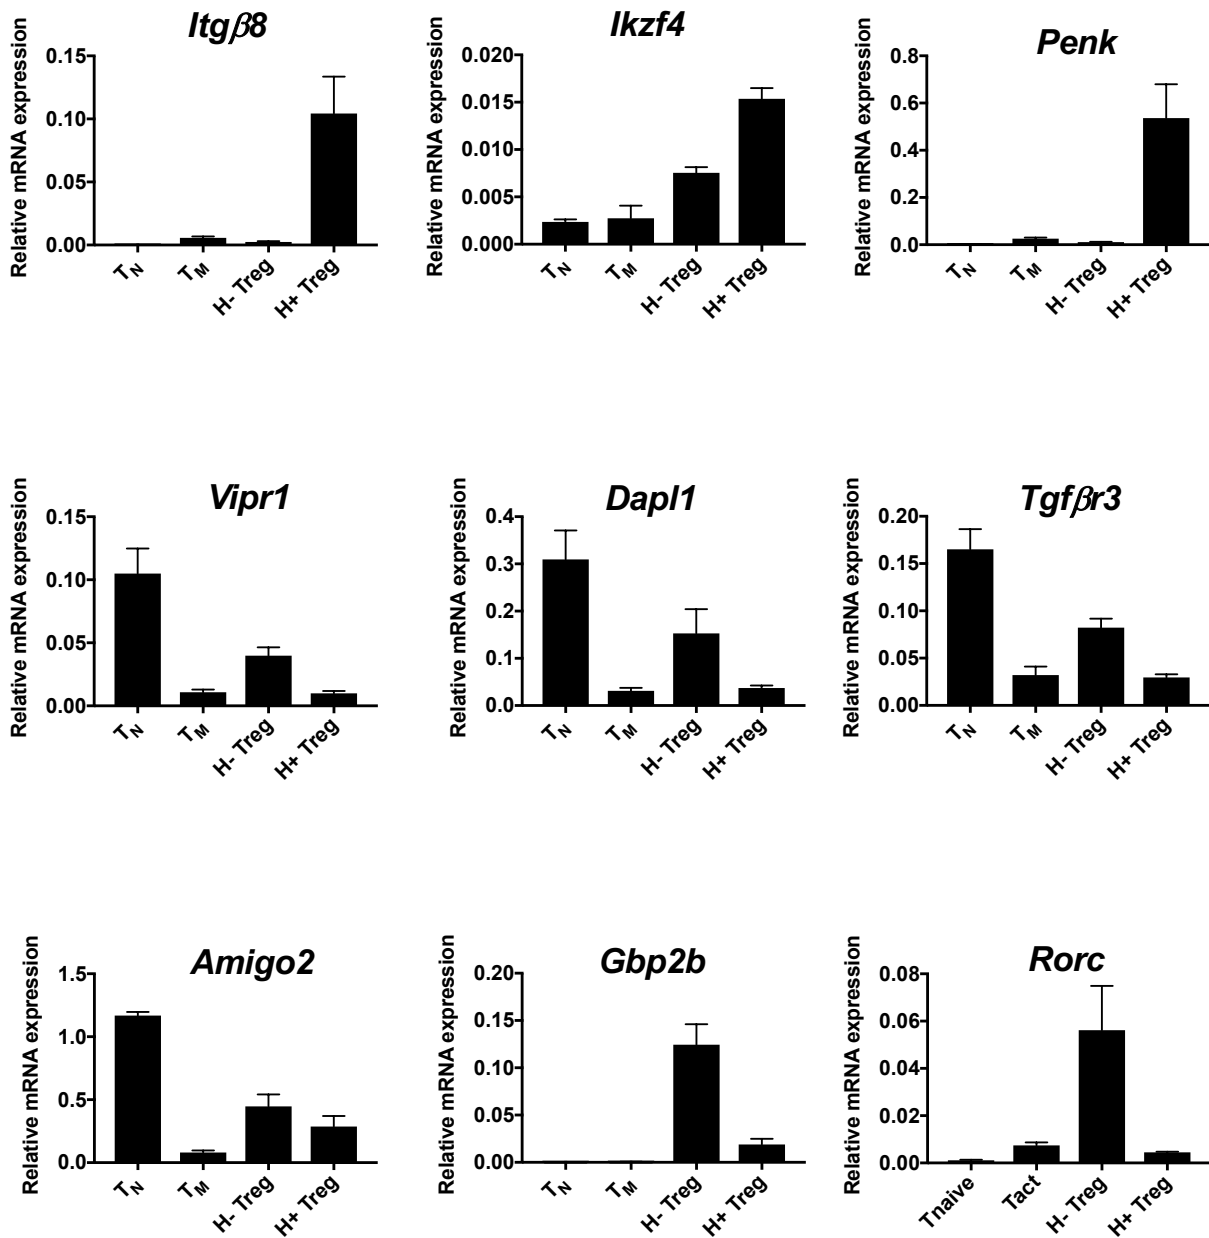

**Fig. S5. Validation of gene expression profiles by qPCR.** T<sub>N</sub> cells (CD4<sup>+</sup>RFP-CD44<sup>-</sup>), T<sub>M</sub> cells (CD4<sup>+</sup>RFP-CD44<sup>+</sup>), Helios<sup>-</sup> Treg (CD4<sup>+</sup>RFP<sup>+</sup>GFP<sup>-</sup>) or Helios<sup>+</sup> Treg (CD4<sup>+</sup>RFP<sup>+</sup>GFP<sup>+</sup>) were sorted from double reporter mice and analyzed by qPCR in triplicate for the indicated genes. Data is representative of at least three independent experiments for each gene.

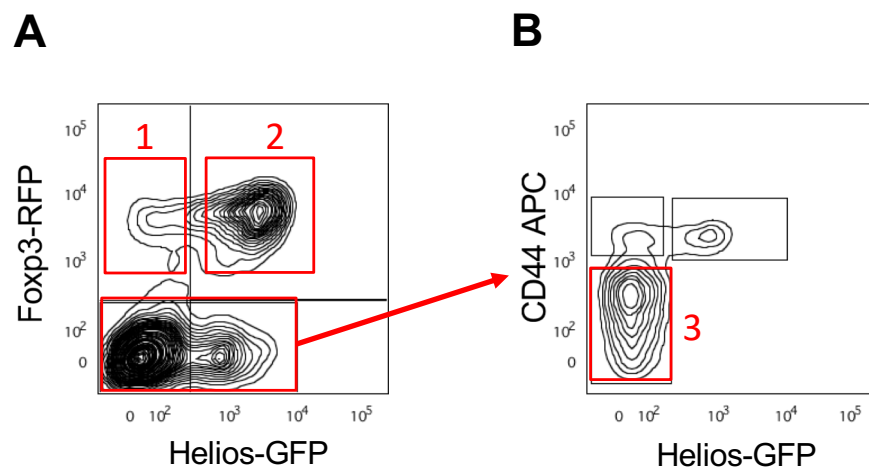

**Fig. S6. Sorting strategy for TCR repertoire analysis.** mLN from double reporter mice were stained for CD4 and CD44 and sorted for the following: **(A)** Population 1: Helios<sup>-</sup> Treg (CD4<sup>+</sup>RFP<sup>+</sup>GFP<sup>-</sup>), Population 2: Helios<sup>+</sup> Treg (CD4<sup>+</sup>RFP<sup>+</sup>GFP<sup>+</sup>), **(B)** Population 3: T<sub>N</sub> cells (CD4<sup>+</sup>RFP<sup>-</sup>CD44<sup>-</sup>).

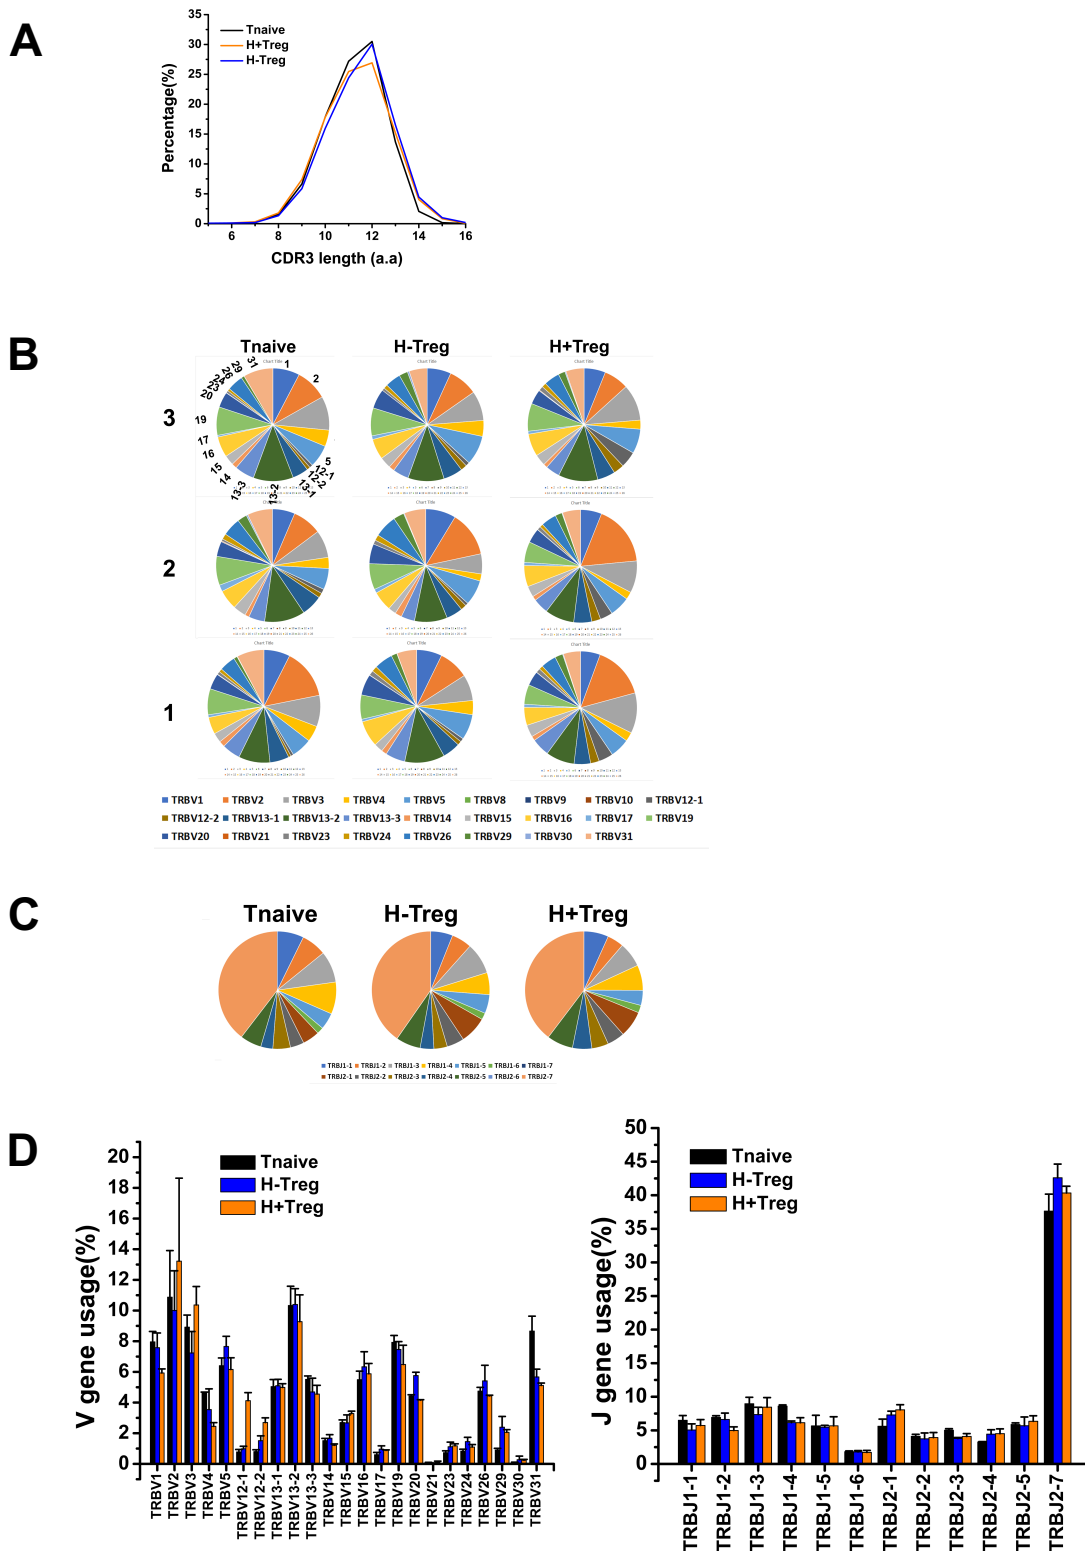

**Fig. S7. TCR repertoire analysis.** DNA was isolated from cells sorted as in Fig. S5 and the *TCRB* CDR3 regions were amplified and sequenced by Adaptive Biotechnologies, Inc. ImmunoSeq software was used to analyze (A) the CDR3 length (B) V gene usage and (C) J gene usage from a representative mouse. (D) Summary of V and J gene usage from all three mice.

|                               | # Cells             | Sequencing Level | Total Templates | Total Productive Templates | Unique Rearrangements |
|-------------------------------|---------------------|------------------|-----------------|----------------------------|-----------------------|
| <u>Exp 1</u>                  |                     |                  |                 |                            |                       |
| #1 Helios <sup>-</sup> Treg   | 136,000             | Deep             | 39,289          | 26,128                     | 18,422                |
| #1 Helios <sup>+</sup> Treg A | 520,000             | Deep x 2         | 123,852         | 87,123                     | 57,673                |
| #1 Helios <sup>+</sup> Treg B |                     |                  | 119,397         | 83,107                     | 54,960                |
| #2 Helios <sup>-</sup> Treg   | 170,000             | Deep             | 70,914          | 48,597                     | 32,350                |
| #2 Helios <sup>+</sup> Treg A | 640,000             | Deep x 2         | 144,529         | 101,302                    | 66,092                |
| #2 Helios <sup>+</sup> Treg B |                     |                  | 135,406         | 94,550                     | 63,422                |
| <u>Exp 2</u>                  |                     |                  |                 |                            |                       |
| #1 Tnaive                     | 3.7x10 <sup>6</sup> | Max              | 2,284,171       | 1,668,176                  | 1,141,034             |
| #1 Helios <sup>-</sup> Treg   | 168,000             | Deep             | 51,762          | 37,612                     | 28,146                |
| #1 Helios <sup>+</sup> Treg   | 866,000             | Ultra            | 506,464         | 372,511                    | 234,063               |
| #2 Tnaive                     | 2.8x10 <sup>6</sup> | Max              | 1,340,467       | 967,896                    | 755,770               |
| #2 Helios <sup>-</sup> Treg   | 133,000             | Deep             | 51,457          | 37,465                     | 28,201                |
| #2 Helios <sup>+</sup> Treg   | 568,000             | Ultra            | 332,569         | 243,214                    | 152,522               |
| #3 Tnaive                     | 2.8x10 <sup>6</sup> | Max              | 1,183,699       | 857,077                    | 674,670               |
| #3 Helios <sup>-</sup> Treg   | 124,000             | Deep             | 42,404          | 30,831                     | 22,832                |
| #3 Helios <sup>+</sup> Treg   | 640,000             | Ultra            | 200,447         | 145,717                    | 99,948                |

**Table. S1. Cell populations used for TCR repertoire analysis.** For Experiment #1, the indicated cell populations from the mLN of two individual mice were obtained by FACS sorting. The number of cells sorted from each population, the sequencing level, total templates, total productive templates and the number of unique rearrangements are indicated. For Experiment #2, the indicated cell populations from the mLN of three individual mice were obtained by FACS sorting.
